# Supplementary material for: Generation and Identification of the Number of Copies of Exogenous Genes and the T-DNA Insertion Site in SCN-Resistance Transformation Event ZHs1-2
Source: MDPI journal article supplement (doi:10.3390/ijms23126849), 2022-06-20
Supplement: s1 [file s1]

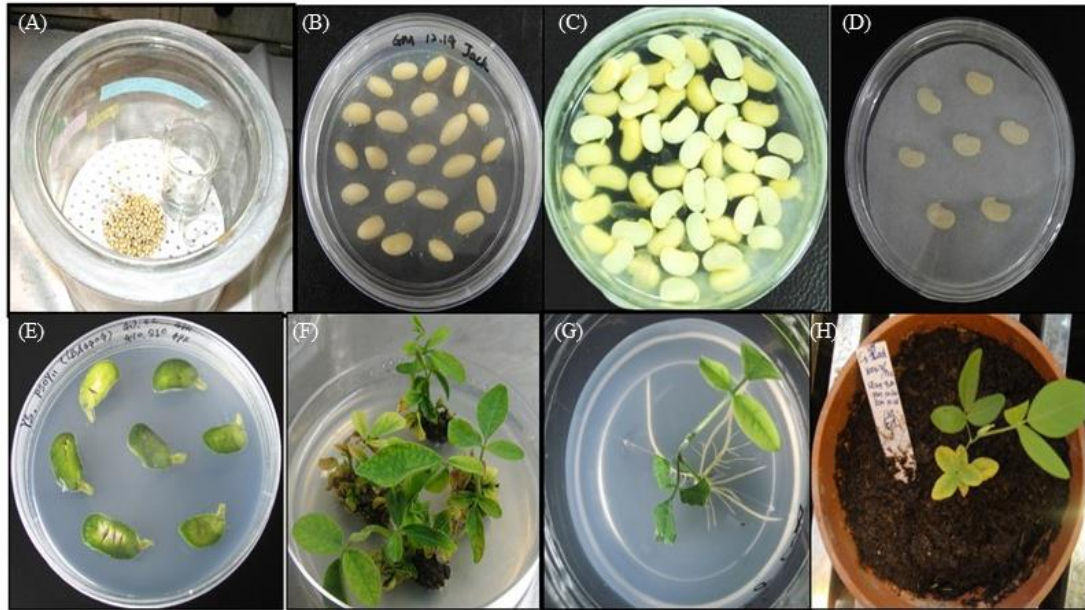

Figure S1 Schematic diagram of the *Agrobacterium-tumefaciens* mediated transformation method in soybean. (A): Seed sterilization by chlorine gas; (B) Seed germination on the germination medium; (C) Isolating 1-2 d germinated cotyledonary explants; (D) Explants inoculating with *Agrobacterium*; (E) Explants co-cultivating with *Agrobacterium*; (F): Explants on the shoot induction medium; (F): Shoot elongation on the shoot elongation medium; (G): Shoot rooting; (H): Plantlet domestication and cultivation.

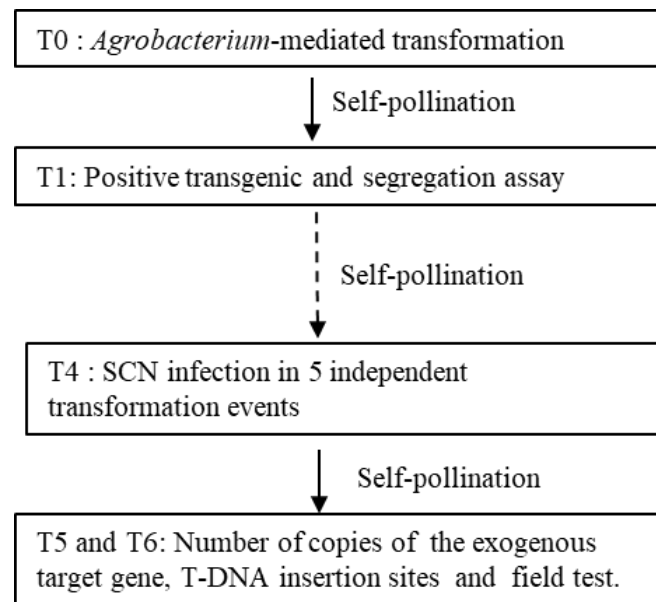

Figure S2 Generation of transgenic progeny and assay index in different progeny. T0, T1, T4, T5 represented different transgenic progeny.
